# Supplementary material for: Egress and invasion machinery of malaria: an in-depth look into the structural and functional features of the flap dynamics of plasmepsin IX and X
Source: Royal Society of Chemistry journal article supplement (doi:10.1039/c8ra04360d), 2018-01-01
Supplement: c8ra04360d1.pdf [file c8ra04360d1.pdf]

**Egress and Invasion Machinery of Malaria: An In-depth Look into The  
Structural and Functional Features of The Flap Dynamics of Plasmeepsin**

**IX and X**

**Supplementary Material**

Geraldene Munsamy<sup>a</sup>, Pritika Ramharack and Mahmoud E. S. Soliman<sup>a\*</sup>

<sup>a</sup> Molecular Bio-computation and Drug Design Laboratory, School of Health Sciences,  
University of KwaZulu-Natal, Westville Campus, Durban 4001, South Africa

\*Corresponding Author: Mahmoud E.S. Soliman

Email: [soliman@ukzn.ac.za](mailto:soliman@ukzn.ac.za)

Telephone: +27 (0) 31 260 8048, Fax: +27 (0) 31 260 7872

| <i>PLASMEPSIN</i> | <i>TEMPLATE</i> | <i>SEQUENCE IDENTITY</i> | <i>Z-SCORE</i> |
|-------------------|-----------------|--------------------------|----------------|
| <b>IX</b>         | 4OBZ            | 35%                      | -6.16          |
| <b>X</b>          | 4OBZ            | 35%                      | -6.22          |

**Table S1.** The Z-score and sequence identity of 4OBZ template used for Plm IX-X

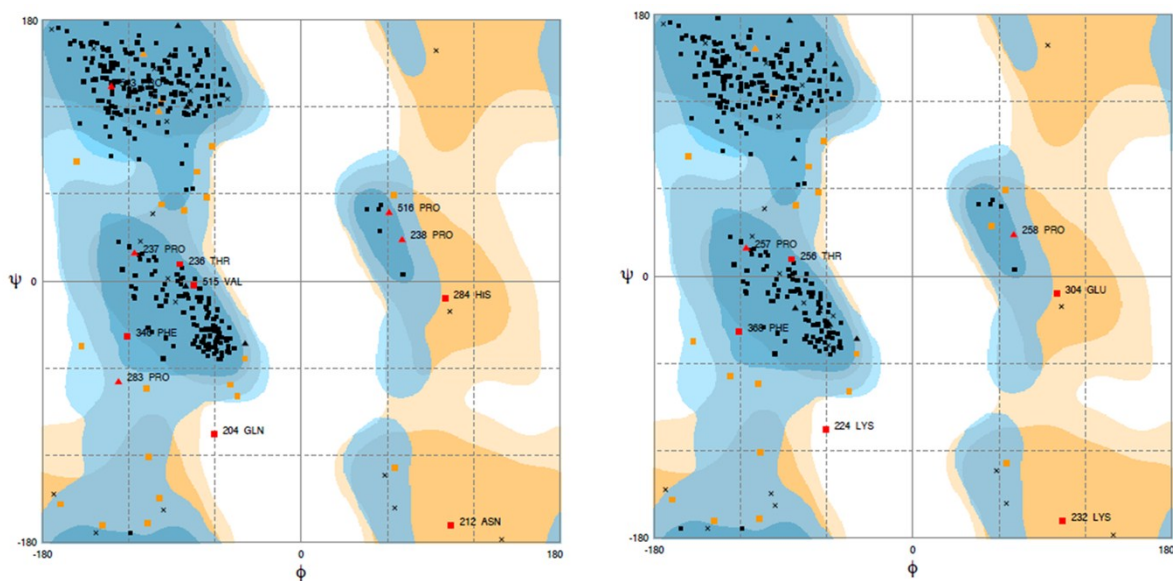

**Figure S1.** Ramachandran plots for models Plm IX (left) and Plm X (right).

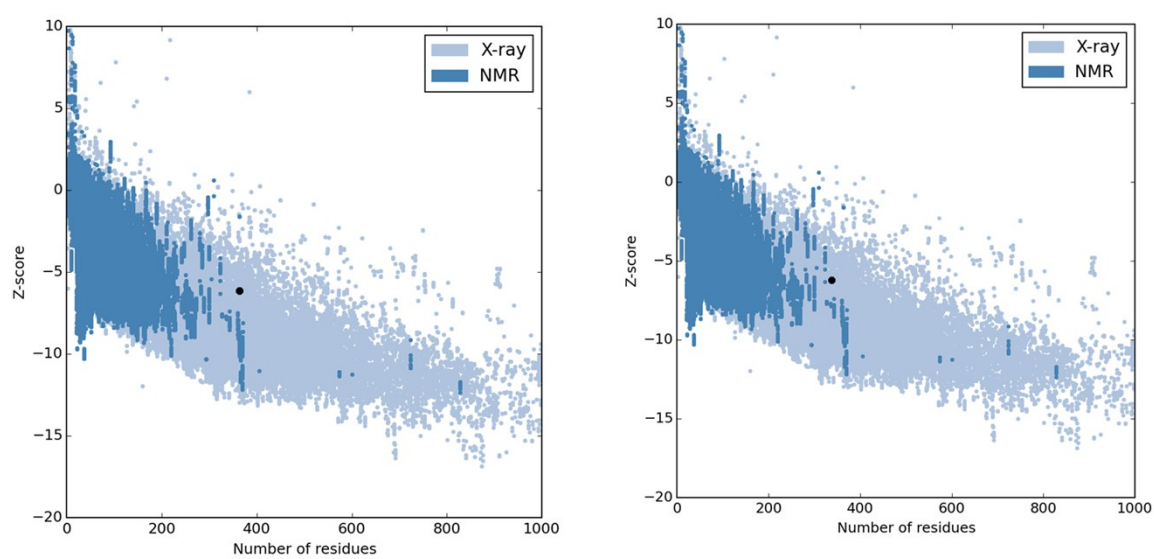

**Figure S2.** Overall model quality generated using ProSA-web of Plm IX (left) and Plm X (right).

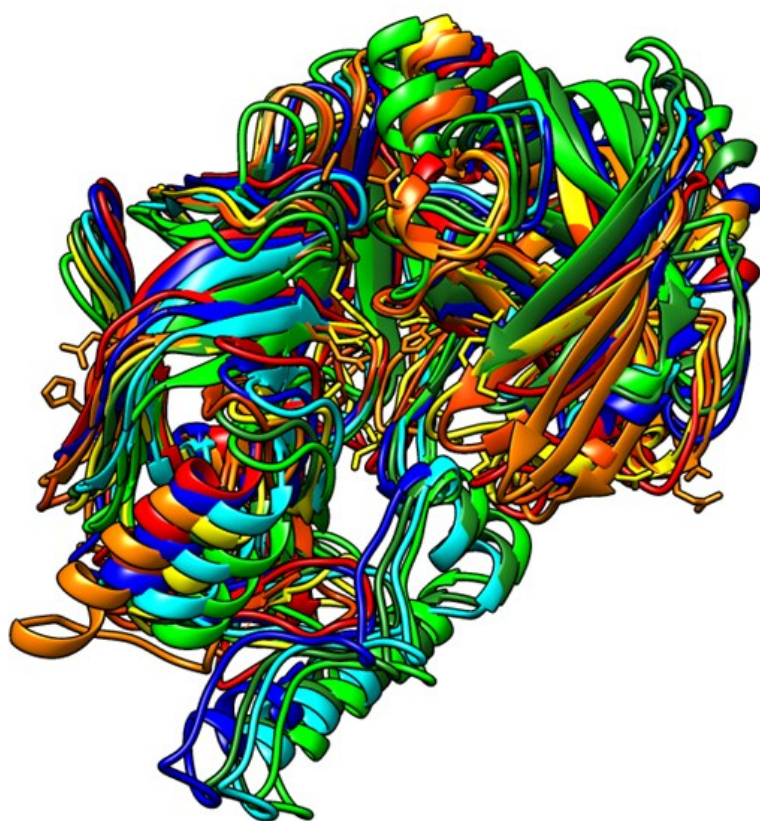

**Figure S3.** Superimposed image of Plasmepsins I (PDB: 3QRV; red), II (PDB:1LF4, orange red), III (PDB: 3FNS, orange), IV (1LS5, green), VI (dark green), VII (cyan), IX (sea green) and X (blue).

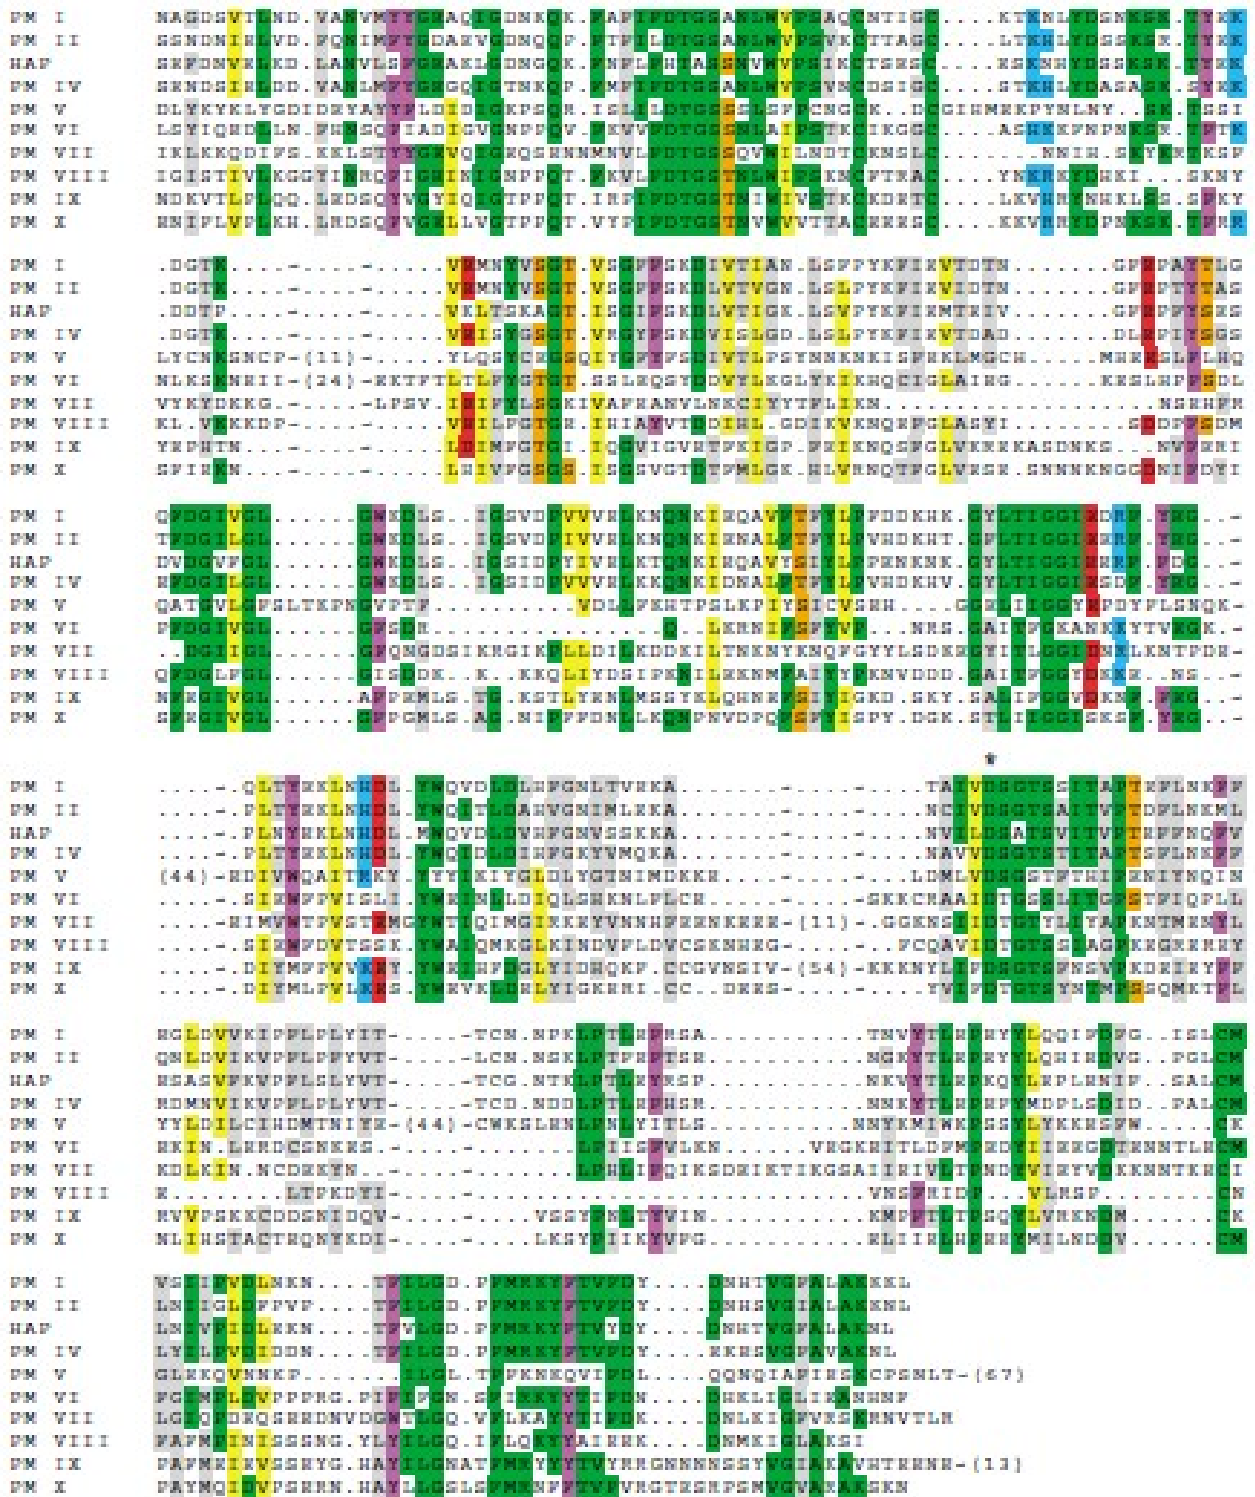

Figure S4. Sequence alignment of Plasmeprin I-X from *Plasmodium falciparum*.

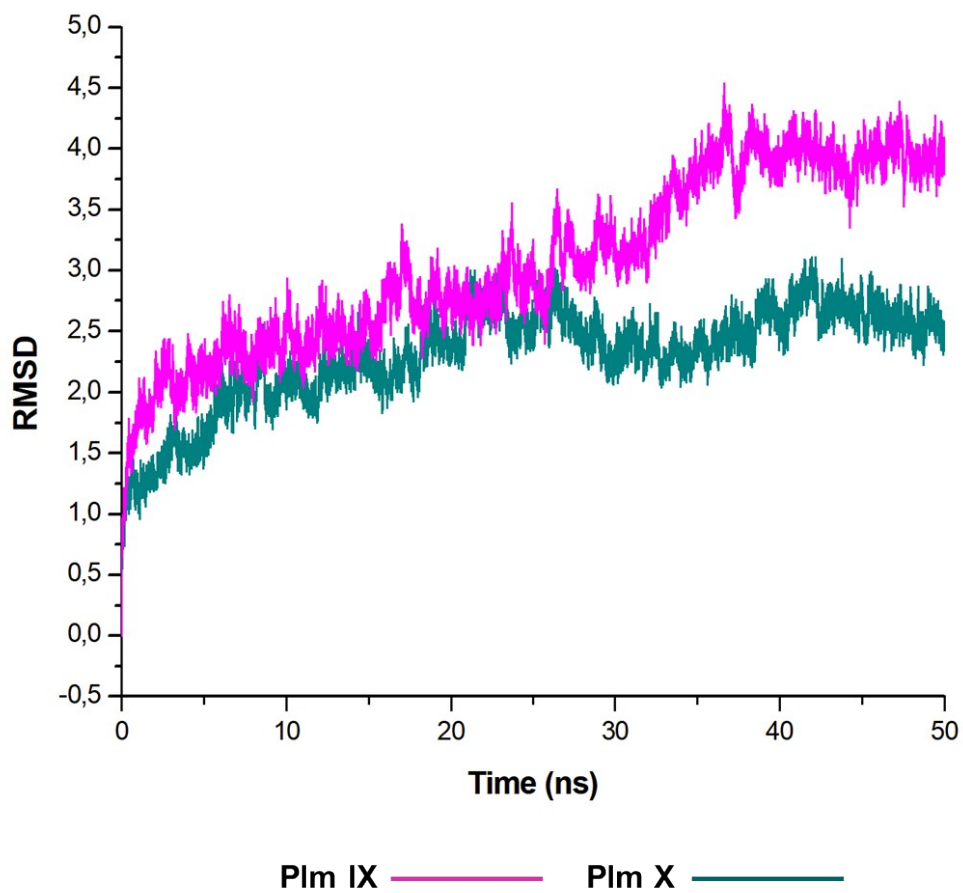

**Figure S5.** RMSD plot of plasmepsin IX and X, displaying system stability after 30ns.

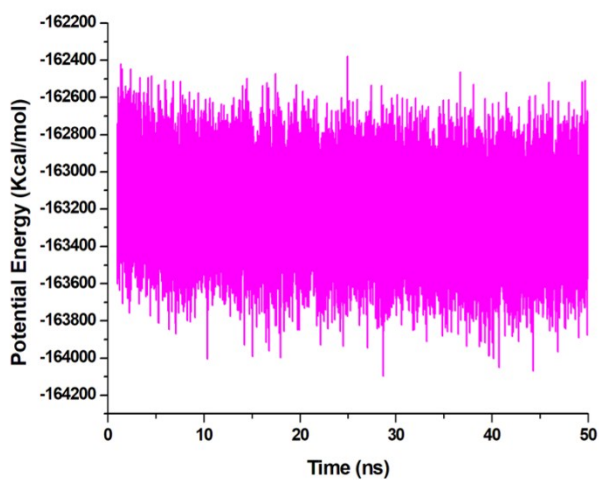

**PE= -163213,16136**

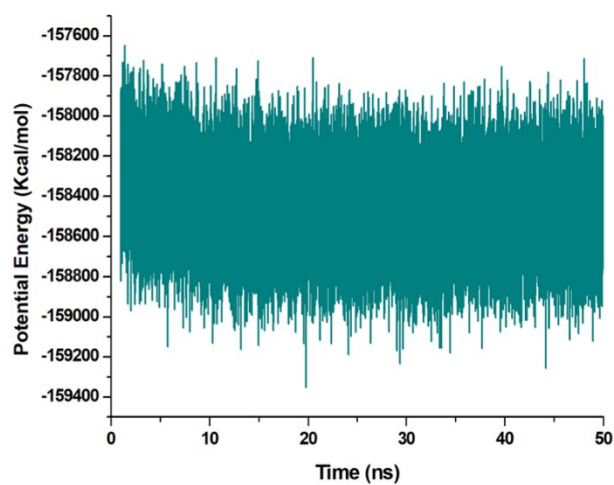

**PE= -158461,37335**

**Figure S6.** Potential energy (PE) plots of Plm IX (left) and Plm X (right) with interaction cutoff of 12 Å. Mean values are presented below the respective plots.
